# Supplementary material for: Synthesis and properties of visible light responsive g-C3N4/Bi2O2CO3 layered heterojunction nanocomposites
Source: Royal Society of Chemistry journal article supplement (doi:10.1039/c5ra04189a), 2015-01-01
Supplement: c5ra04189a1.pdf [file c5ra04189a1.pdf]

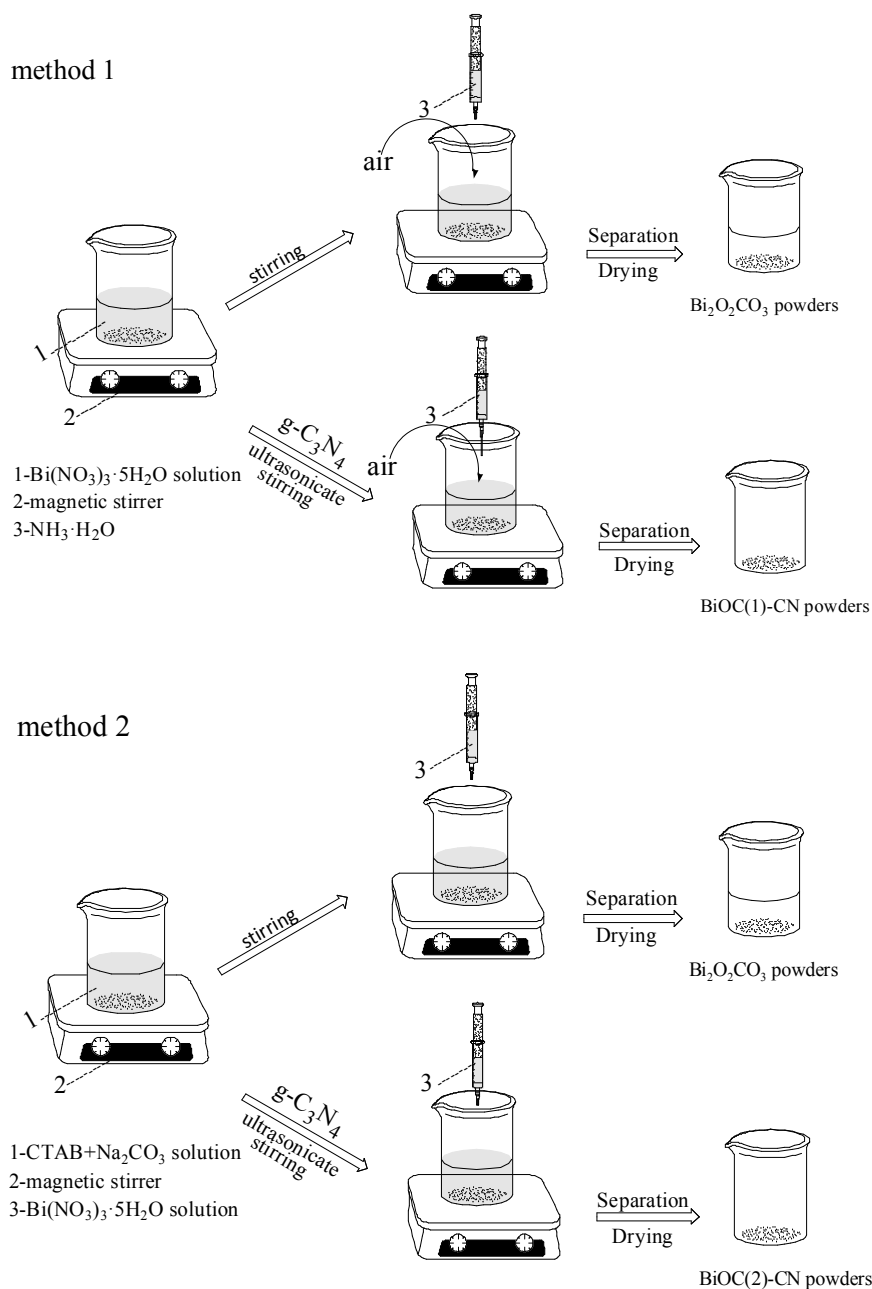

**Fig. S1** The schematic representation of the preparative route of catalysts.

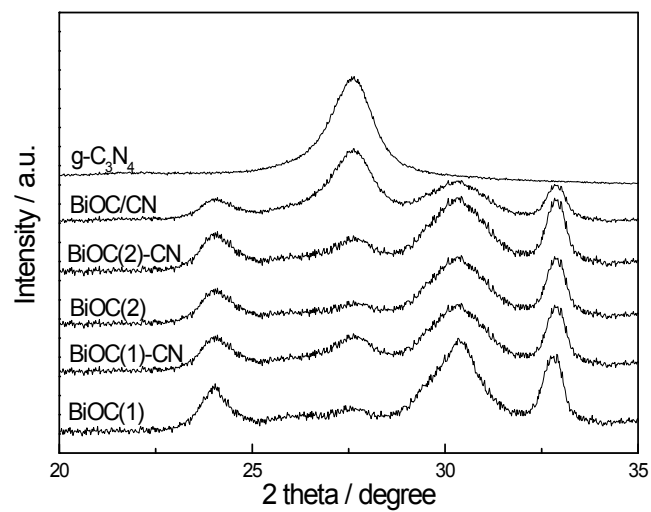

**Fig. S2** The enlarged figure of XRD patterns with diffraction angle 20-35 degree.

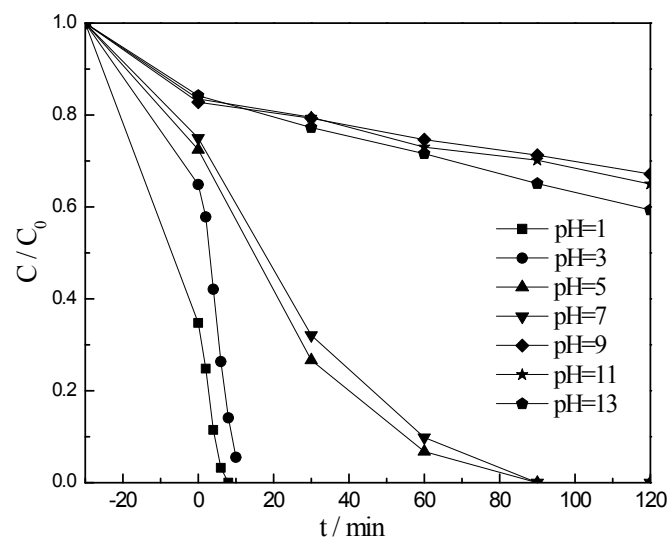

**Fig. S3** The influence of pH value on the photocatalytic RhB degradation over BiOC(2)-CN.

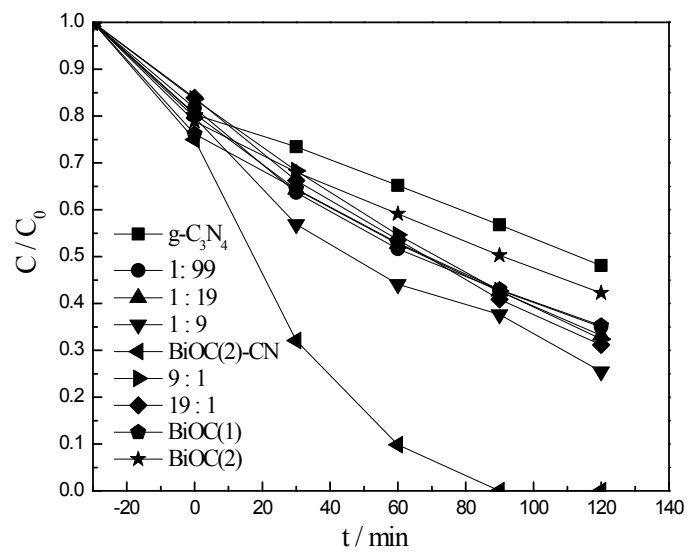

**Fig. S4** The influence of mass ratio of  $g-C_3N_4$  to  $Bi_2O_2CO_3$  in prepared  $g-C_3N_4/Bi_2O_2CO_3$  nanocomposites on the photocatalytic RhB degradation.

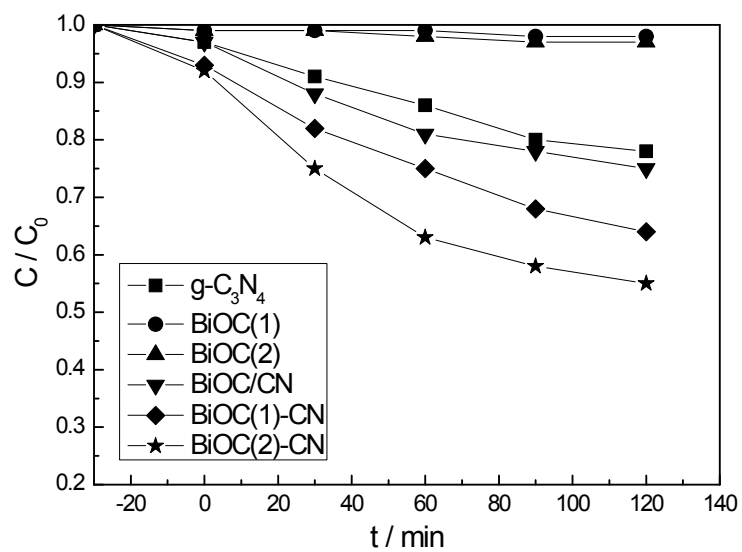

**Fig. S5** Photocatalytic performances of g-C<sub>3</sub>N<sub>4</sub>, BiOC(1), BiOC(2), BiOC/CN and g-C<sub>3</sub>N<sub>4</sub>/Bi<sub>2</sub>O<sub>2</sub>CO<sub>3</sub> nanocomposites in the degradation of phenol under visible light irradiation.

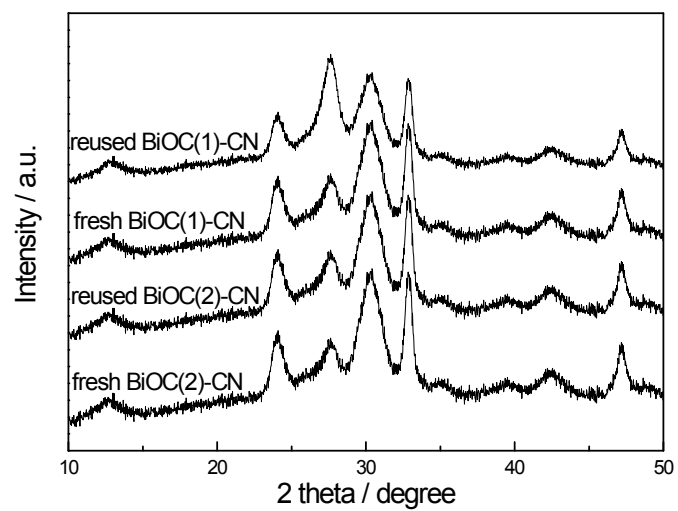

**Fig. S6** The XRD patterns of fresh and reused BiOC(1) and BiOC(2).

Table S1 The rate constants of photocatalytic RhB and phenol degradation over as-prepared catalysts

| Catalyst                                   | g-C <sub>3</sub> N <sub>4</sub> | BiOC(1) | BiOC(2) | BiOC/CN | BiOC(1)-CN | BiOC(2)-CN |
|--------------------------------------------|---------------------------------|---------|---------|---------|------------|------------|
| RhB degradation (min <sup>-1</sup> )       | 0.00427                         | 0.00649 | 0.00517 | 0.00818 | 0.01259    | 0.03181    |
| Phenol degradation<br>(min <sup>-1</sup> ) | 0.00085                         | --      | --      | 0.00091 | 0.00202    | 0.00389    |
